# Supplementary material for: Discovering the drivers of clonal hematopoiesis
Source: PubMed Central journal article supplement (PMC9308779; doi:10.1038/s41467-022-31878-0), 2022-07-23
Supplement: 41467_2022_31878_MOESM2_ESM.pdf [file 41467_2022_31878_MOESM2_ESM.pdf]

# Description of Additional Supplementary File

## Discovering the drivers of clonal hematopoiesis

Oriol Pich<sup>1</sup>, Iker Reyes-Salazar<sup>1</sup>, Abel Gonzalez-Perez<sup>1,2,^</sup>, Nuria Lopez-Bigas<sup>1,2,3,^</sup>

1. Institute for Research in Biomedicine (IRB Barcelona), The Barcelona Institute of Science and Technology, Baldri Reixac, 10, 08028 Barcelona, Spain.

2. Research Program on Biomedical Informatics, Universitat Pompeu Fabra, Barcelona, Catalonia, Spain.

3. Institució Catalana de Recerca i Estudis Avançats (ICREA), Barcelona, Spain

<sup>^</sup>Corresponding authors

Abel Gonzalez-Perez: [abel.gonzalez@irbbarcelona.org](mailto:abel.gonzalez@irbbarcelona.org)

Nuria Lopez-Bigas: [nuria.lopez@irbbarcelona.org](mailto:nuria.lopez@irbbarcelona.org)

**Supplementary Data file 1. Mutational profiles of signatures active across blood samples in the metastasis cohort.**

**Supplementary Data file 2. Compendium of clonal hematopoiesis driver genes.**

**Supplementary Data file 3. Non-coding elements significant by the analysis of three driver discovery methods.**

**Supplementary Data file 4. Examples of mutations potentially affecting transcription factor binding sites in enhancer elements.** P-values associated with the score of Transcription Factor binding to wild-type sequences within regulatory elements were computed using FIMO (see main Methods.)
